# Supplementary material for: Success and time implications of SpO2 measurement through pulse oximetry among hospitalised children in rural Bangladesh: Variability by various device-, provider- and patient-related factors
Source: PubMed Central journal article supplement (PMC9041243; doi:10.7189/jogh.12.04036), 2022-04-23
Supplement: jogh-12-04036-s001.pdf [file jogh-12-04036-s001.pdf]

**Supplementary Figures:**

Figure S1: Histograms of time-reading for obtaining a stable SpO<sub>2</sub> reading by groups to assess normality.

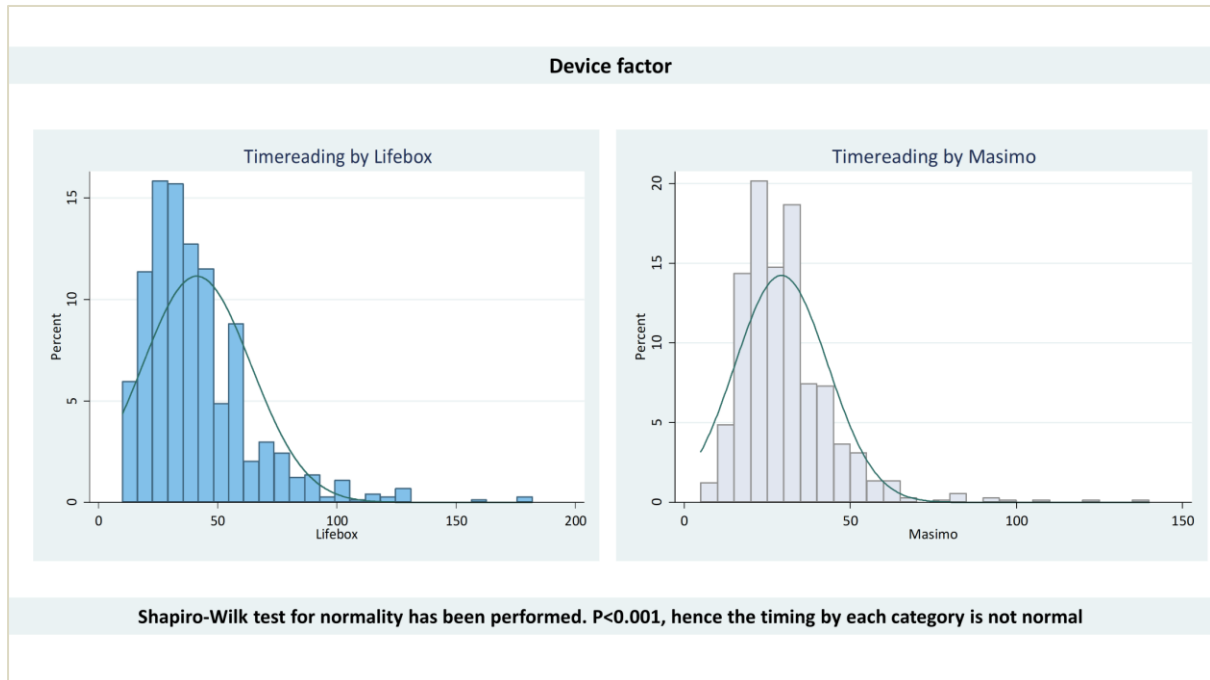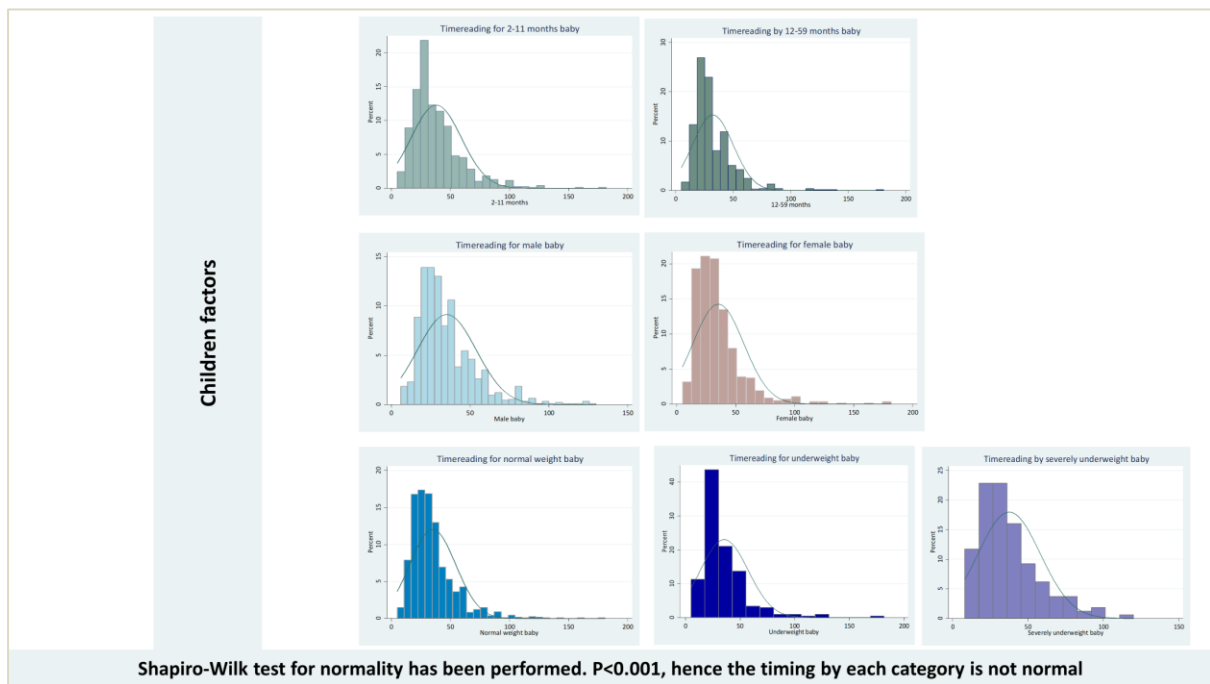

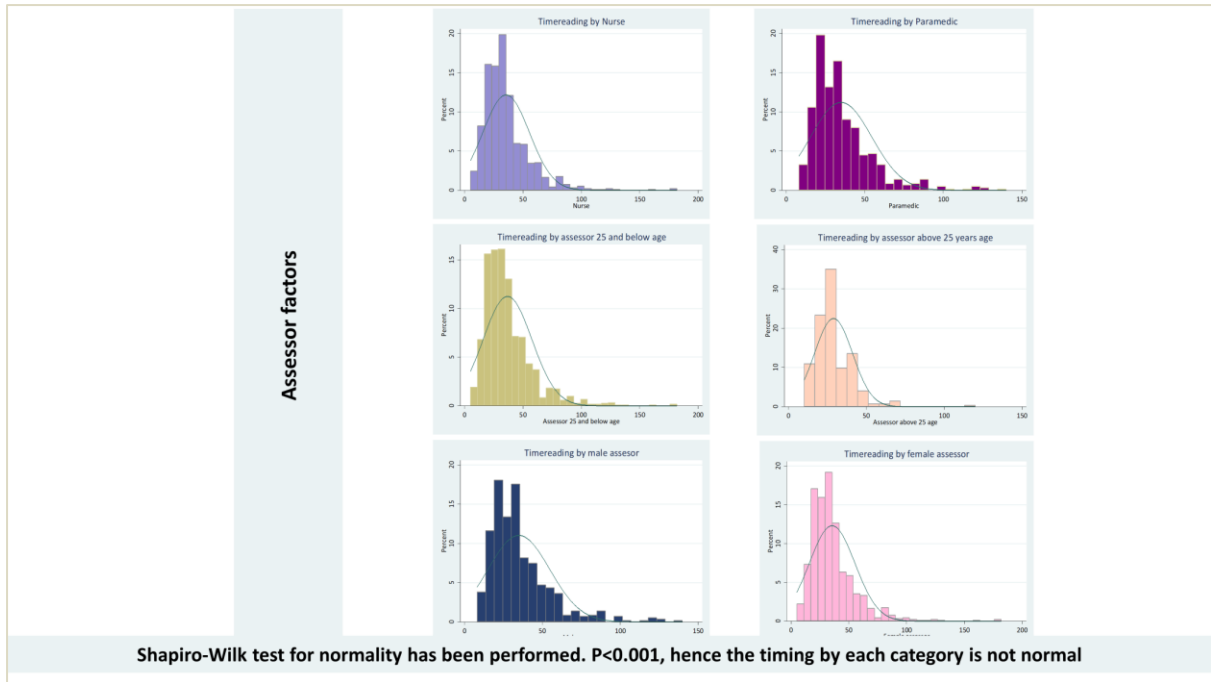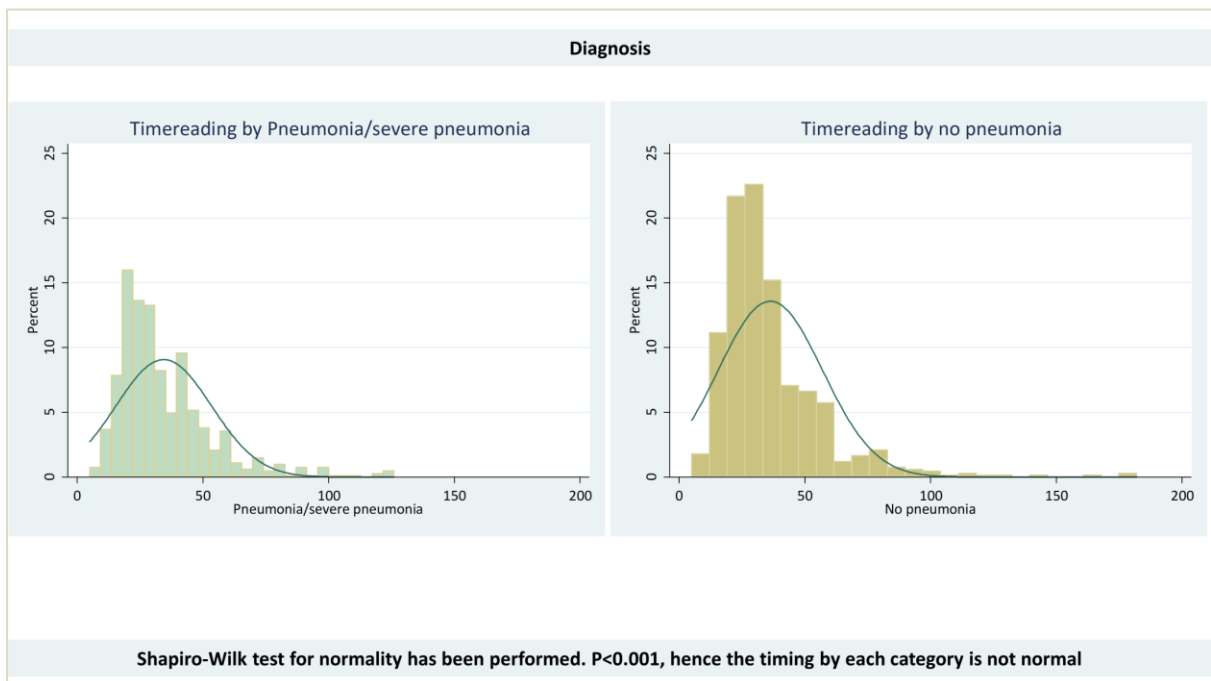

**Supplementary Tables:**

Table S1: Lifebox vs Masimo model, technical specification and price comparison.

| Requirements                                                                               | Lifebox A-care AH-M1                           | Masimo Rad-5v®                                                                                |
|--------------------------------------------------------------------------------------------|------------------------------------------------|-----------------------------------------------------------------------------------------------|
| Price                                                                                      |                                                |                                                                                               |
| Price (USD)                                                                                | 200                                            | 500                                                                                           |
| General requirements                                                                       |                                                |                                                                                               |
| For adults, children and neonates                                                          | Yes                                            | Yes                                                                                           |
| For all skin pigmentations                                                                 | No data found                                  | No data found                                                                                 |
| Weight range for each patient category                                                     | No data found                                  | No data found                                                                                 |
| SpO2 detection to include the range: 70–100%                                               | Yes, 0-100%                                    | Yes, 1-100%                                                                                   |
| SpO2 resolution: 1% or less.                                                               | 1%                                             | 1%                                                                                            |
| SpO2 accuracy within $\pm 3\%$ for all patients and perfusion/movement conditions.         | 70%-100%: $\pm 2\%$ ; 0%-69%: not defined      | 2% with no motion low perfusion adults/paediatrics. 3% with motion and low perfusion neonates |
| Pulse rate range: 30–240 bpm.                                                              | 25-250 bpm                                     | 25-240 bpm                                                                                    |
| Pulse rate resolution: 1 bpm or less                                                       | 1 bpm                                          | 1 bpm                                                                                         |
| Pulse rate accuracy within $\pm 3$ bpm.                                                    | $\pm 2$ bpm                                    | 3 bpm with no motion and in low perfusion, 5 bpm with motion                                  |
| Audio                                                                                      |                                                |                                                                                               |
| Audible and visual alarms for low/high saturation and pulse rate, threshold set by user    | Yes                                            | Yes                                                                                           |
| Audible and visual alarms for sensor error or disconnected, system errors, low battery     | Yes                                            | Yes                                                                                           |
| Probes                                                                                     |                                                |                                                                                               |
| Capable of working with, and supplied with, adult, paediatric and neonatal reusable probes | Yes                                            | Yes                                                                                           |
| Electrical characteristics                                                                 |                                                |                                                                                               |
| Operated by replaceable battery power supply, either rechargeable or single use            | Li-ion rechargeable battery or, 3 AA batteries | 4XAA Alkaline batteries                                                                       |
| Display                                                                                    |                                                |                                                                                               |
| %SpO <sub>2</sub>                                                                          | Yes                                            | Yes                                                                                           |
| Pulse rate                                                                                 | Yes                                            | Yes                                                                                           |
| Plethysmographic waveform                                                                  | Yes                                            | Yes                                                                                           |
| Alarm messages                                                                             | Yes                                            | Yes                                                                                           |
| Battery state indication                                                                   | Yes                                            | Yes                                                                                           |
| Others                                                                                     | No                                             | Perfusion Index, Signal IQ (SIQ) bar                                                          |
| Optional                                                                                   |                                                |                                                                                               |

| Requirements                                           | Lifebox A-care AH-M1                     | Masimo Rad-5v®                                                                                                                                                                                                                                                                                                      |
|--------------------------------------------------------|------------------------------------------|---------------------------------------------------------------------------------------------------------------------------------------------------------------------------------------------------------------------------------------------------------------------------------------------------------------------|
| Internal data storage for patient trends and event log | Yes; 1-99 ID and 300 records for each ID | The Rad-5 can store 72 hours of SpO2 and Pulse Rate and Perfusion Index trend data, captured at 2 second intervals. This trend data can then be transferred to a PC for evaluation. Trend data is stored in non-volatile memory, so it is not erased when the device is shut off or when the batteries are replaced |
| FDA/CE Approval                                        |                                          |                                                                                                                                                                                                                                                                                                                     |
| FDA/CE Approved                                        | Yes                                      | Yes,                                                                                                                                                                                                                                                                                                                |



Table S3: Number of assessments by assessor type.

| <b>Type of assessor</b> | <b>Number of assessments</b> |
|-------------------------|------------------------------|
| Nurse 1                 | 64                           |
| Nurse 2                 | 76                           |
| Nurse 3                 | 78                           |
| Nurse 4                 | 82                           |
| Nurse 5                 | 74                           |
| Nurse 6                 | 76                           |
| Nurse 7                 | 86                           |
| Nurse 8                 | 96                           |
| Nurse 9                 | 80                           |
| Nurse 10                | 96                           |
| Nurse 11                | 94                           |
| Paramedic 1             | 104                          |
| Paramedic 2             | 92                           |
| Paramedic 3             | 76                           |
| Paramedic 4             | 38                           |
| Paramedic 5             | 94                           |
| Paramedic 6             | 88                           |
| Paramedic 7             | 84                           |

Table S4: Generalised estimating equation (GEE) regression to assess the association between time taken to obtain successful measurement of SpO<sub>2</sub> within 60 seconds and different characteristics of participants presented in adjusted odds ratio and 95% Confidence Interval (N=1474).

|                                    | %  | Crude Odds ratio | 95% CI Lower limit | 95% CI Upper limit | P value | Adjusted Odds ratio | 95% CI Lower limit | 95% CI Upper limit | P value |
|------------------------------------|----|------------------|--------------------|--------------------|---------|---------------------|--------------------|--------------------|---------|
| <b>Diagnosis</b>                   |    |                  |                    |                    |         |                     |                    |                    |         |
| Fever and other                    | 92 |                  |                    |                    |         |                     |                    |                    |         |
| Pneumonia or severe pneumonia      | 93 | 1.13             | 0.76               | 1.67               | 0.55    | 1.33                | 0.87               | 2.04               | 0.19    |
| <b>Age of child</b>                |    |                  |                    |                    |         |                     |                    |                    |         |
| 2-11 months                        | 89 |                  |                    |                    |         |                     |                    |                    |         |
| 12- 59 months                      | 96 | 2.07             | 1.32               | 3.24               | 0.00    | 2.64                | 1.64               | 4.24               | 0.00    |
| <b>Sex of child</b>                |    |                  |                    |                    |         |                     |                    |                    |         |
| Male                               | 92 |                  |                    |                    |         |                     |                    |                    |         |
| Female                             | 92 | 0.92             | 0.63               | 1.36               | 0.69    | 0.87                | 0.58               | 1.32               | 0.52    |
| <b>Weight for age of child</b>     |    |                  |                    |                    |         |                     |                    |                    |         |
| Not Under-Weight (-2 SD and above) | 93 |                  |                    |                    |         |                     |                    |                    |         |
| Under-Weight (below -2SD)          | 92 | 1.06             | 0.60               | 1.86               | 0.84    | 1.09                | 0.60               | 1.98               | 0.78    |
| Severely Under Weight (below -3SD) | 89 | 0.87             | 0.49               | 1.57               | 0.65    | 0.87                | 0.48               | 1.57               | 0.64    |
| <b>Type of pulse oximetry</b>      |    |                  |                    |                    |         |                     |                    |                    |         |
| Lifebox                            | 87 |                  |                    |                    |         |                     |                    |                    |         |
| Masimo                             | 98 | 6.97             | 3.41               | 14.25              | 0.00    | 7.29                | 3.74               | 14.20              | 0.00    |
| <b>Type of assessors</b>           |    |                  |                    |                    |         |                     |                    |                    |         |
| Nurse                              | 92 |                  |                    |                    |         |                     |                    |                    |         |
| Paramedic                          | 92 | 0.98             | 0.31               | 3.07               | 0.98    | 1.19                | 0.41               | 3.44               | 0.75    |
| <b>Age of assessors (in years)</b> |    |                  |                    |                    |         |                     |                    |                    |         |
| 25 years and below                 | 91 |                  |                    |                    |         |                     |                    |                    |         |
| Above 25                           | 98 | 5.86             | 0.63               | 54.46              | 0.12    | 4.75                | 1.21               | 18.58              | 0.03    |
| <b>Sex of assessor</b>             |    |                  |                    |                    |         |                     |                    |                    |         |
| Male                               | 92 |                  |                    |                    |         |                     |                    |                    |         |
| Female                             | 92 | 1.06             | 0.34               | 3.32               | 0.91    | 0.85                | 0.30               | 2.45               | 0.76    |
